# Supplementary material
Source: PubMed Central journal article supplement (PMC2891238)

A

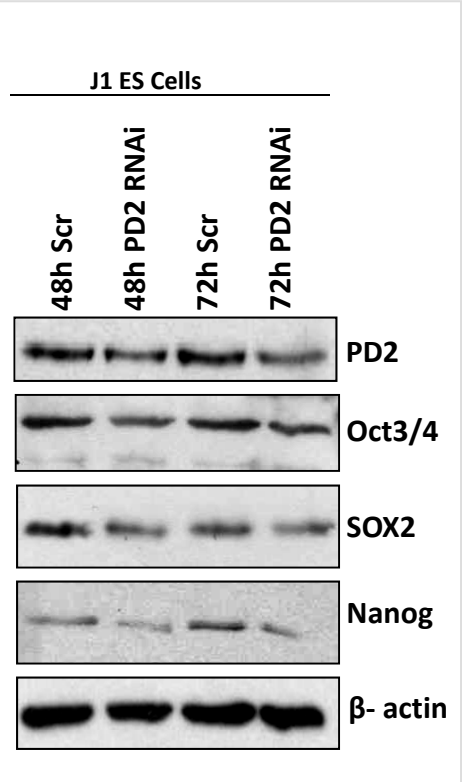

B

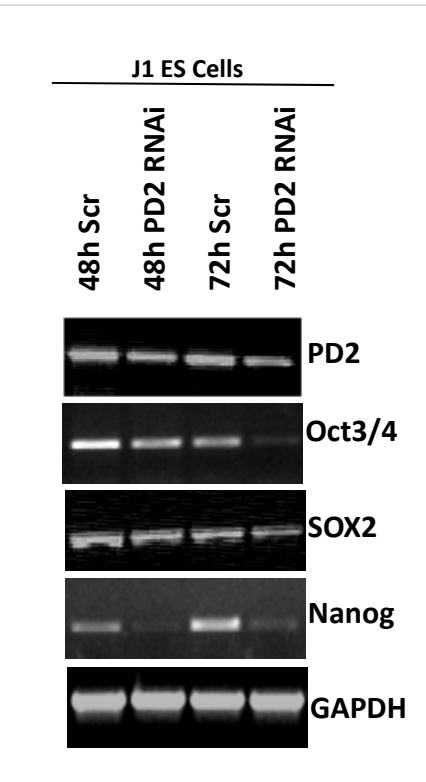

C

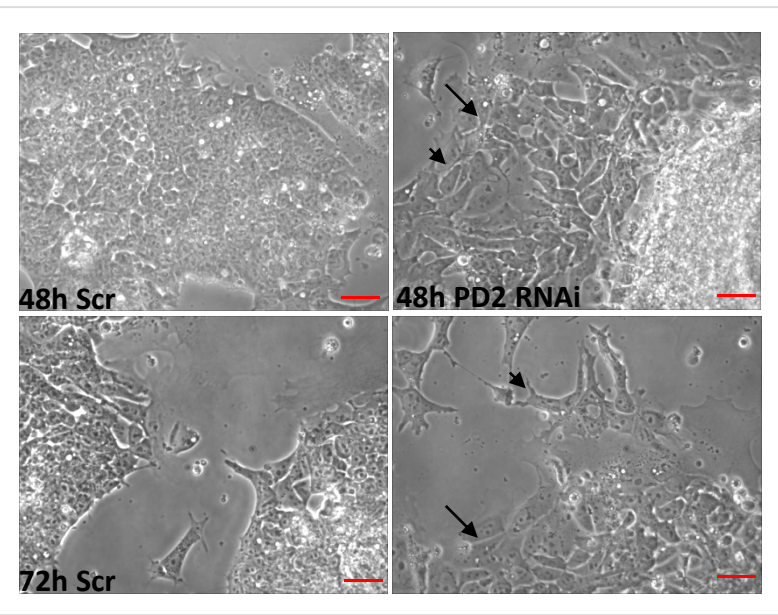

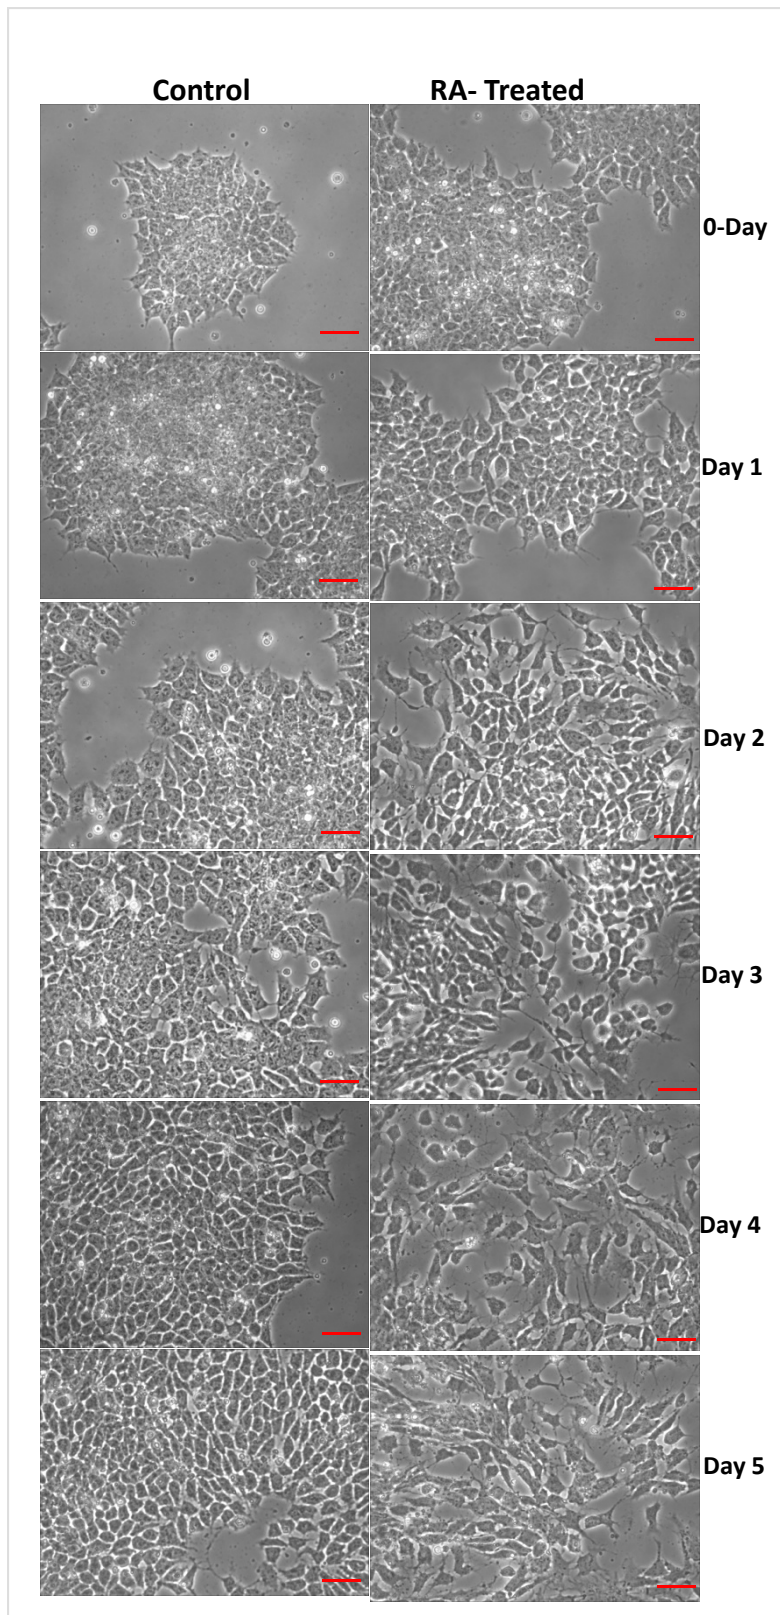

## RA- Treatment

0-Minute

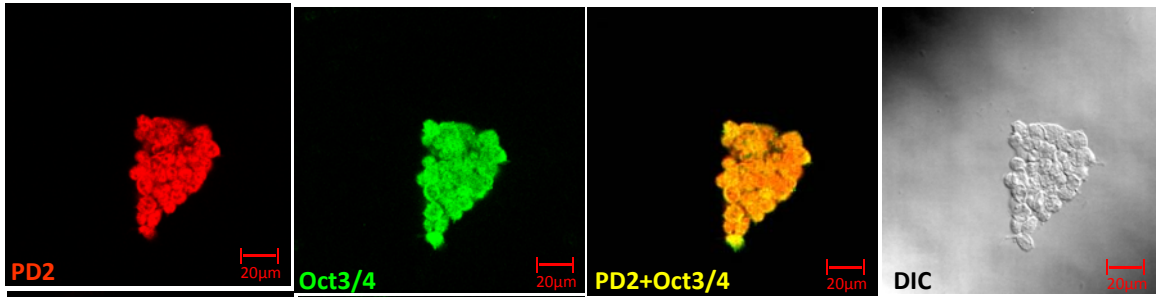

Day 1

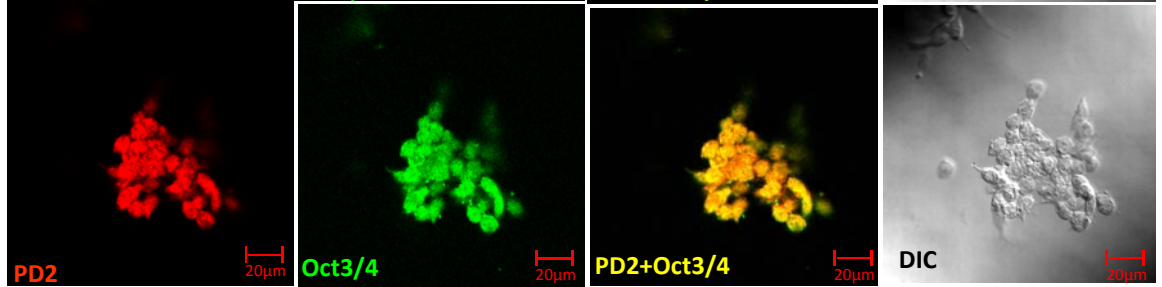

Day 2

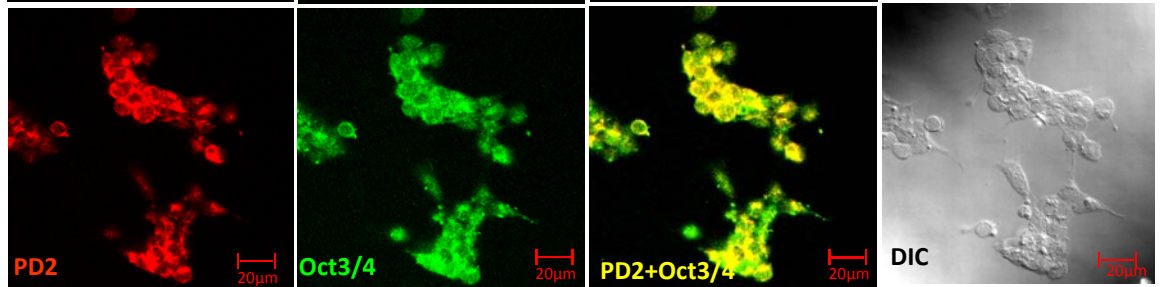

Day 3

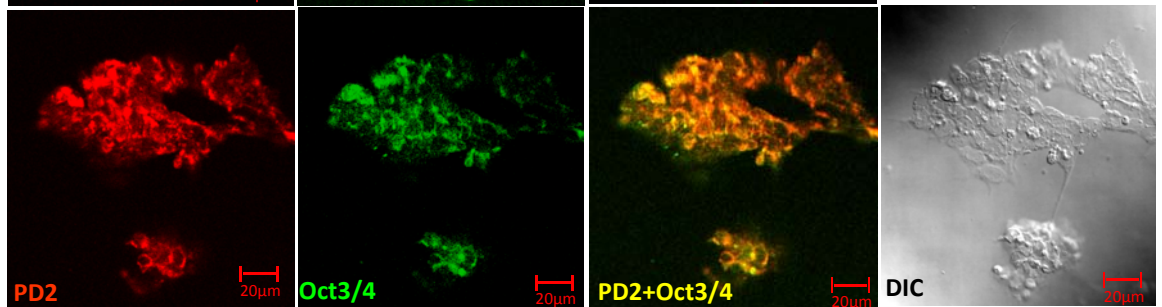

Day 4

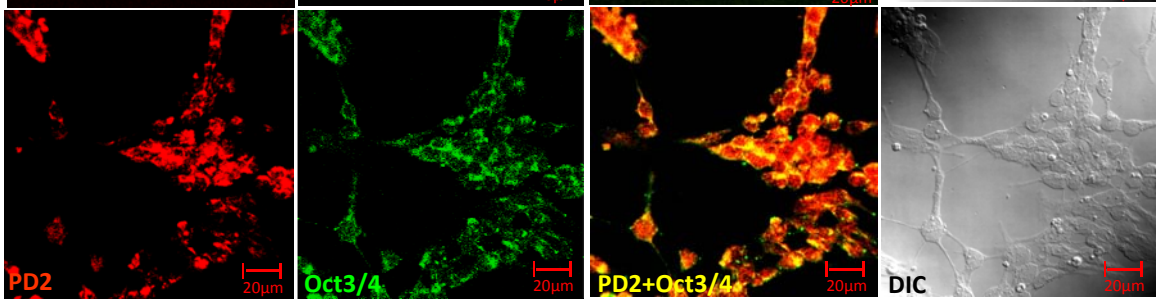

Day 5

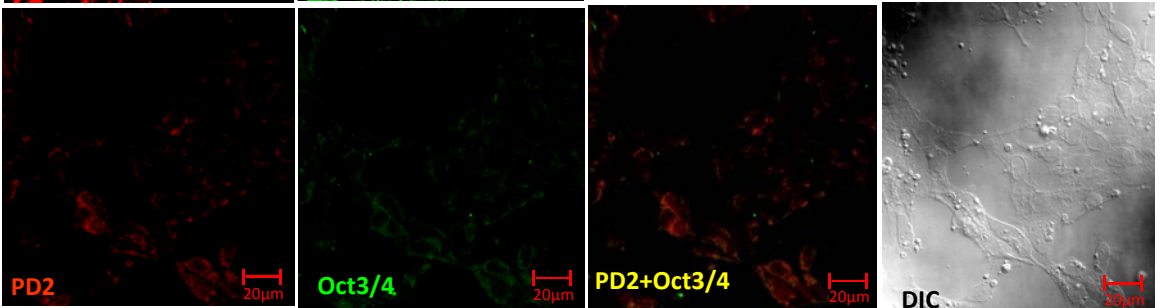

**A**

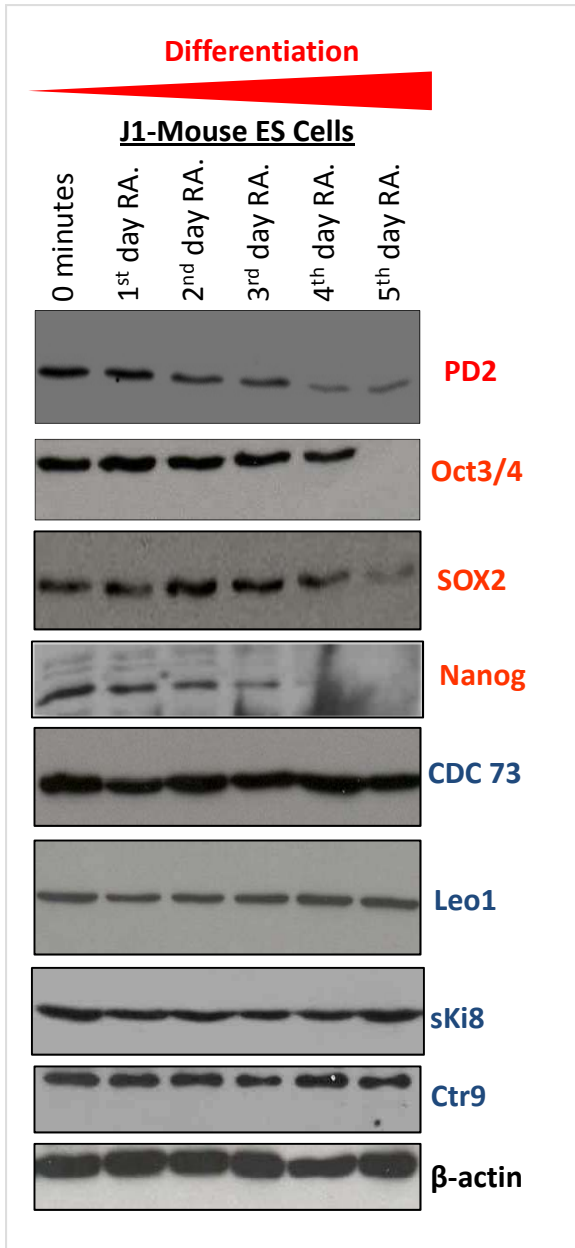

**B**

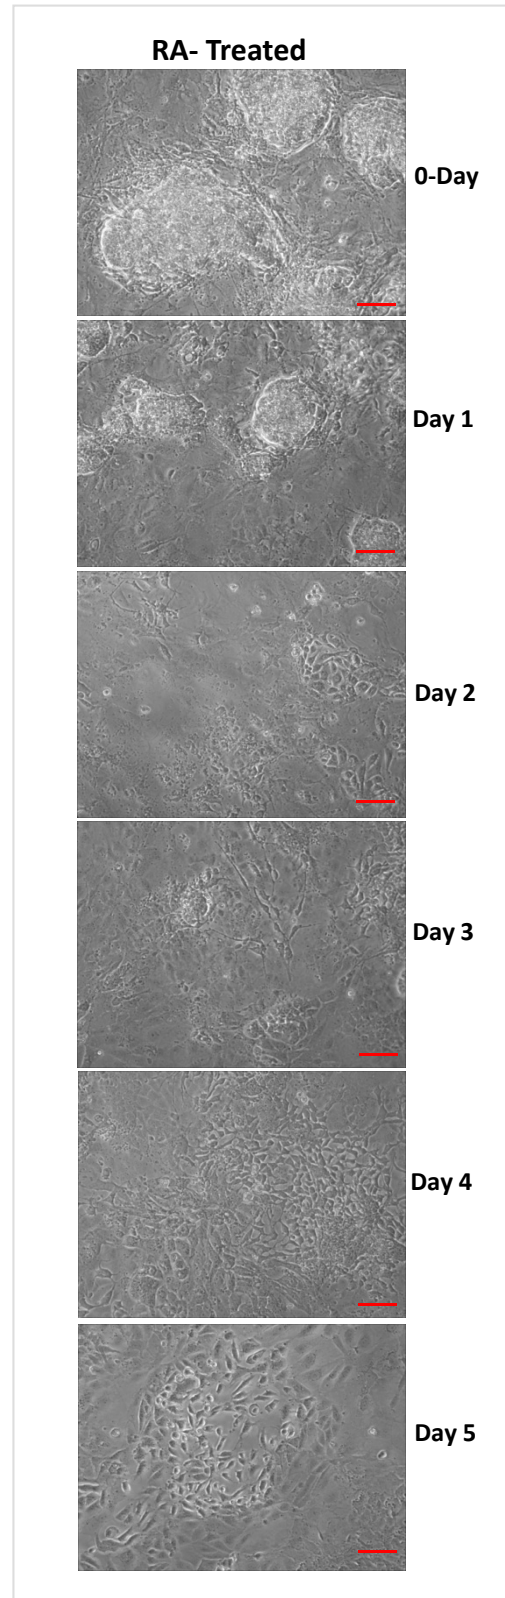

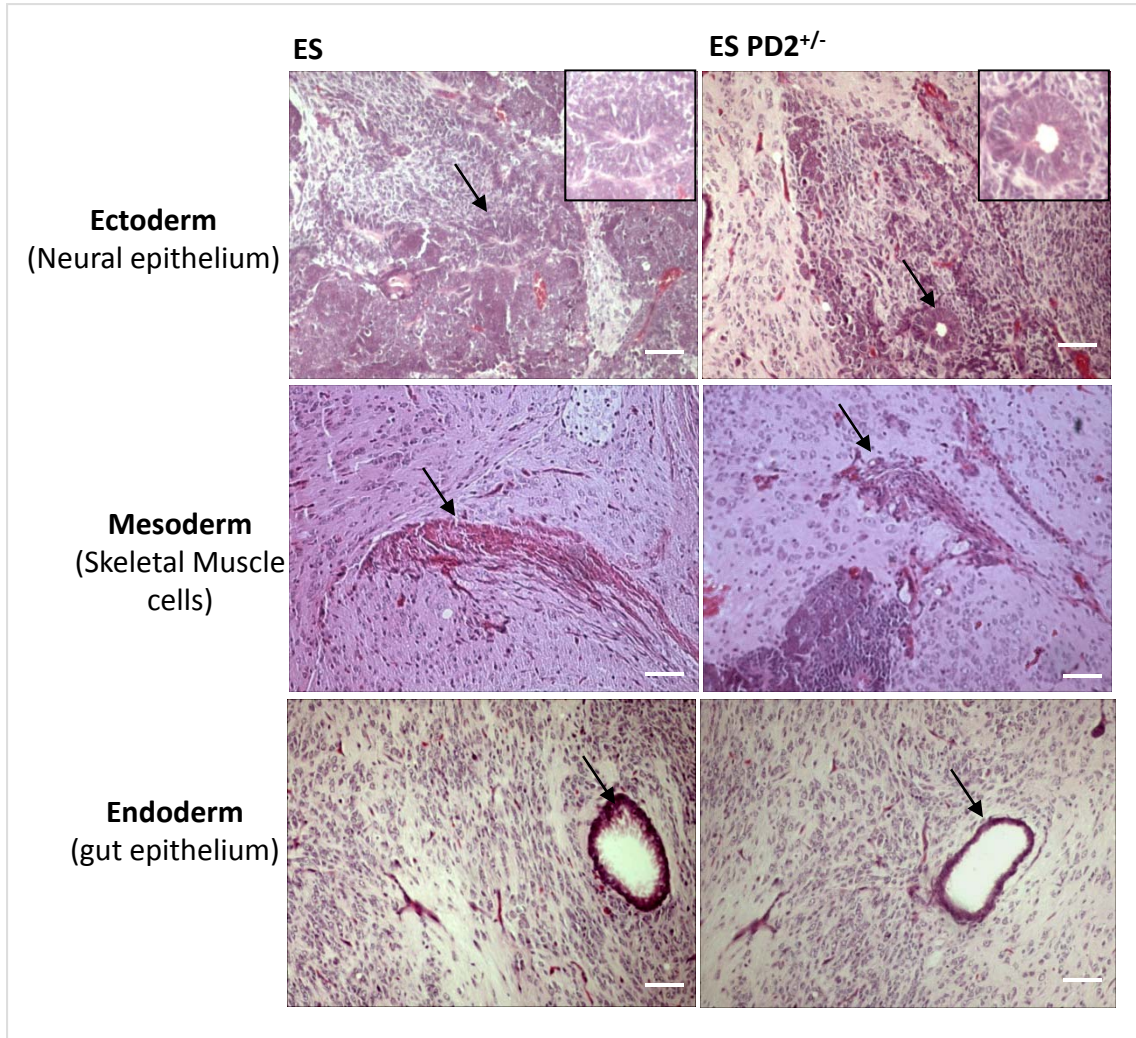

Supplement: NIHMS211086-supplement-supp_info_2.pdf [file NIHMS211086-supplement-supp_info_2.pdf]
